# Supplementary material for: Multi-scale RNA comparison based on RNA triple vector curve representation
Source: PubMed Central journal article supplement (PMC3599440; doi:10.1186/1471-2105-13-280), 2012-10-30

**Figure S1:** The Phylogenetic tree by RNAdist using Unweighted Pair Group Method with Arithmetic Mean (UPGMA) for the four RNA classes (5S rRNA, miRNA, RNaseP arch and tRNA).

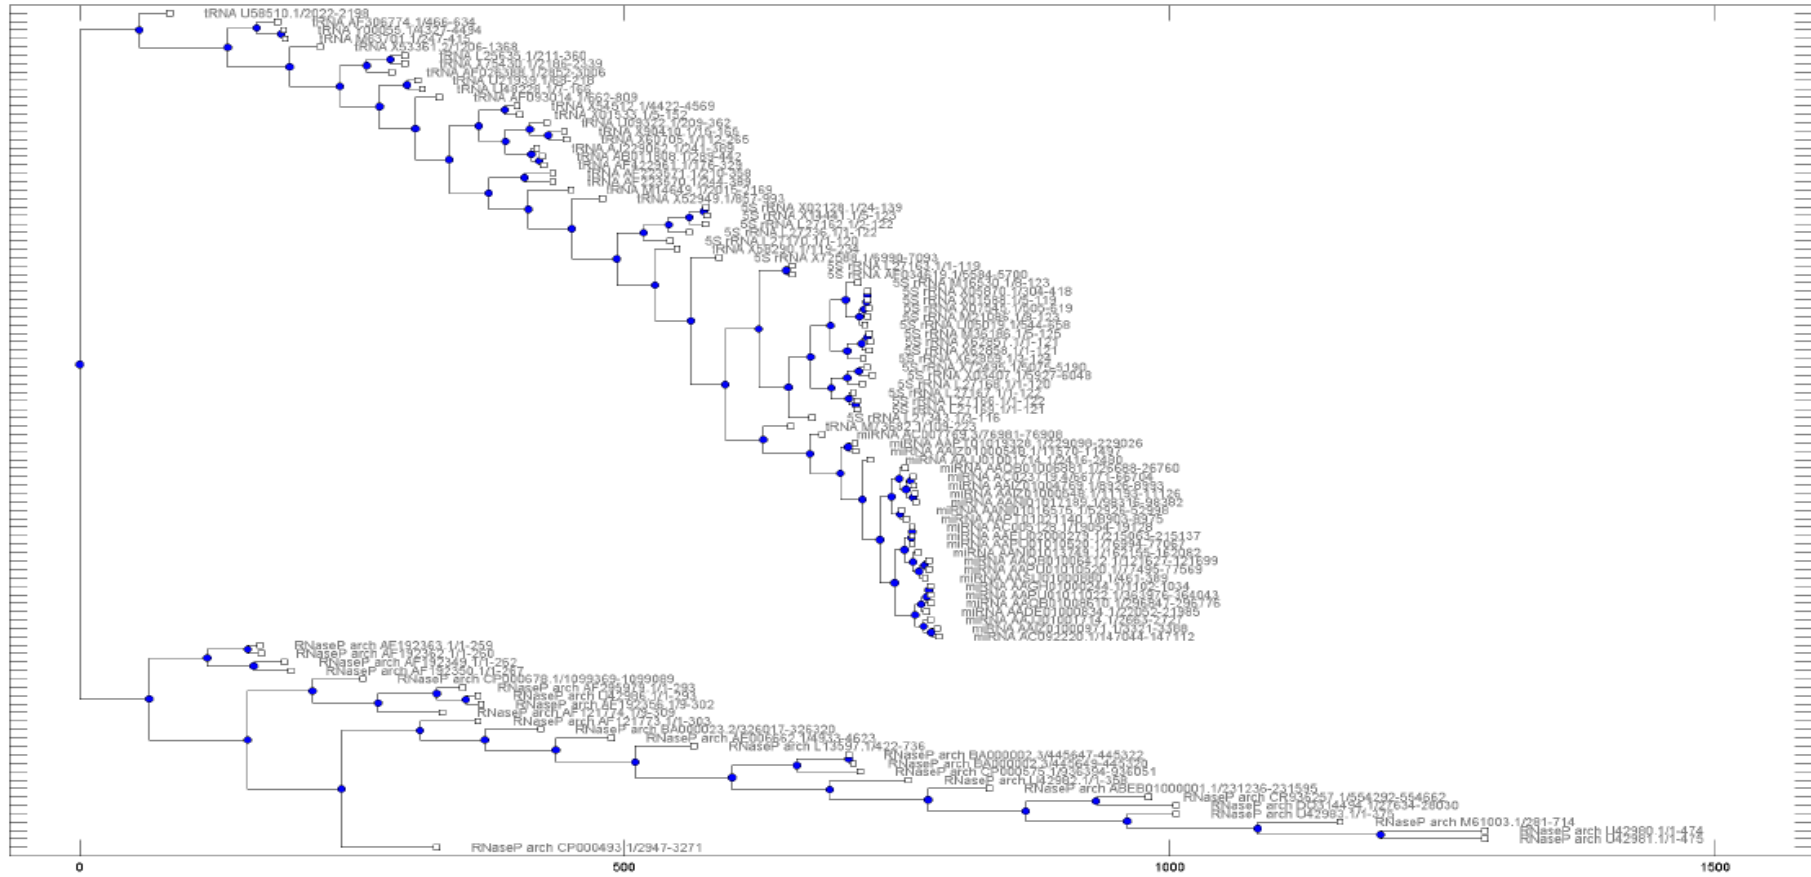

**Figure S2:** The Phylogenetic tree by RNAdistance using Unweighted Pair Group Method with Arithmetic Mean (UPGMA) using Unweighted Pair Group Method with Arithmetic Mean (UPGMA) for the four RNA classes (5S rRNA, miRNA, RNaseP arch and tRNA).

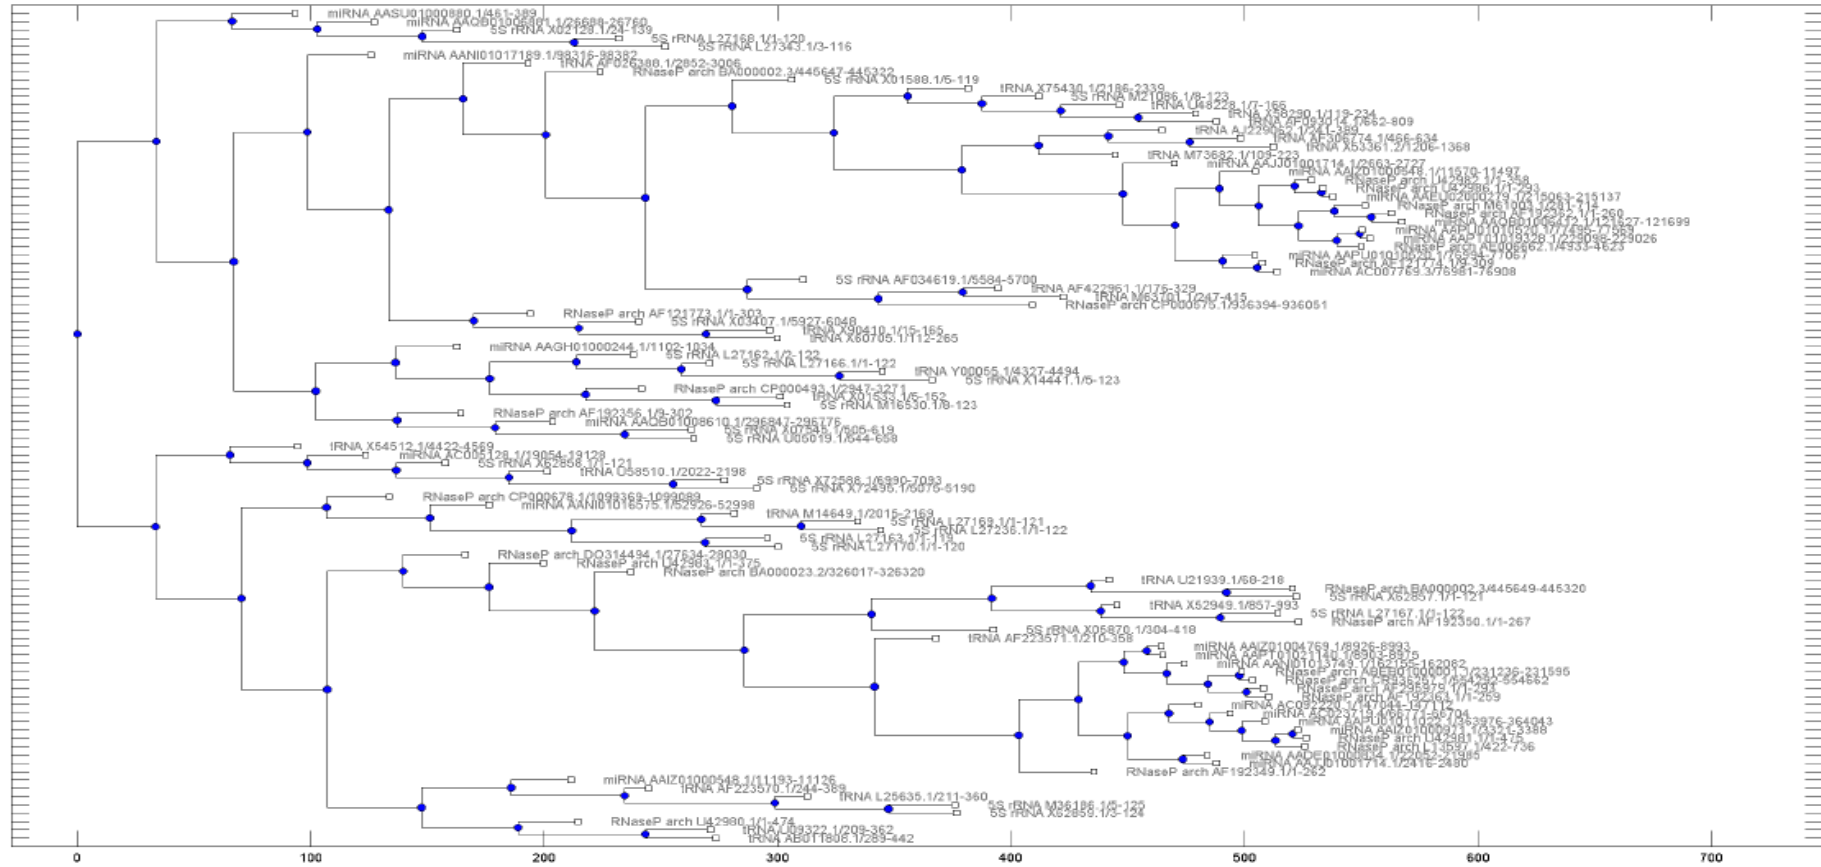

**Figure S3:** Largest structure mutation for 21 RNA Ribosomal sequences using RNAmcTV-Curve, RNAdistance and RNApdist

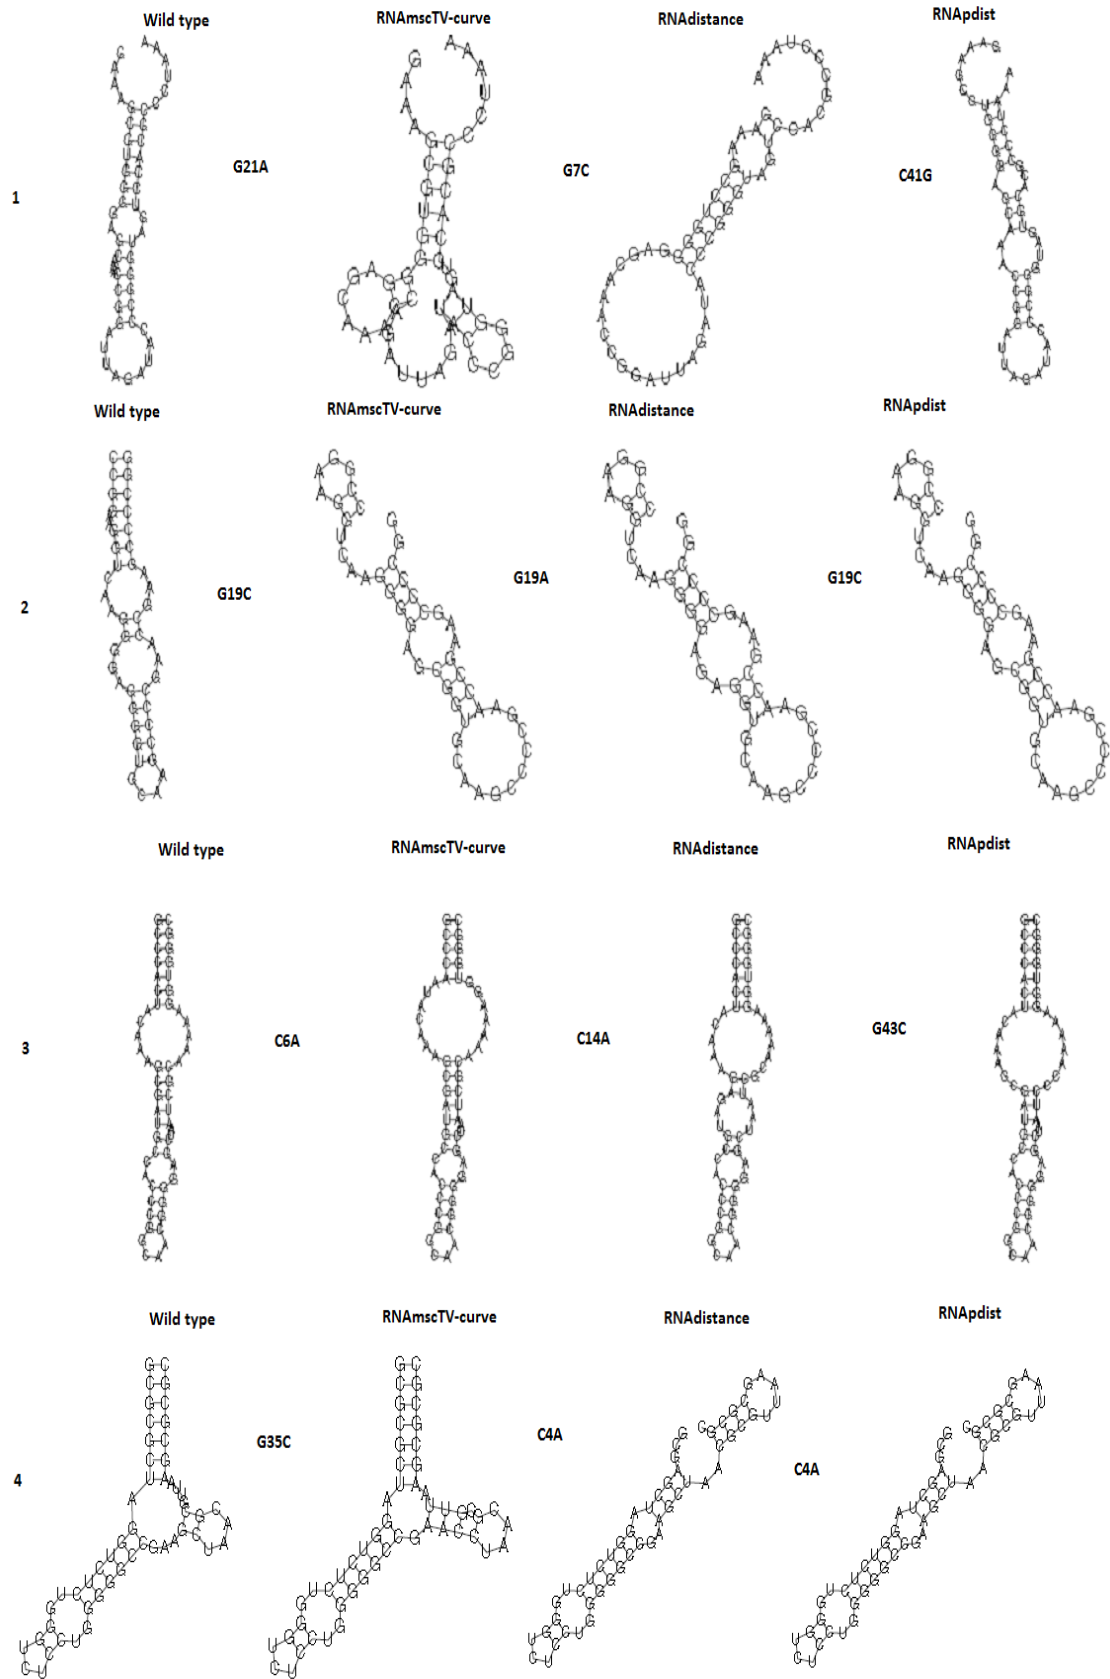

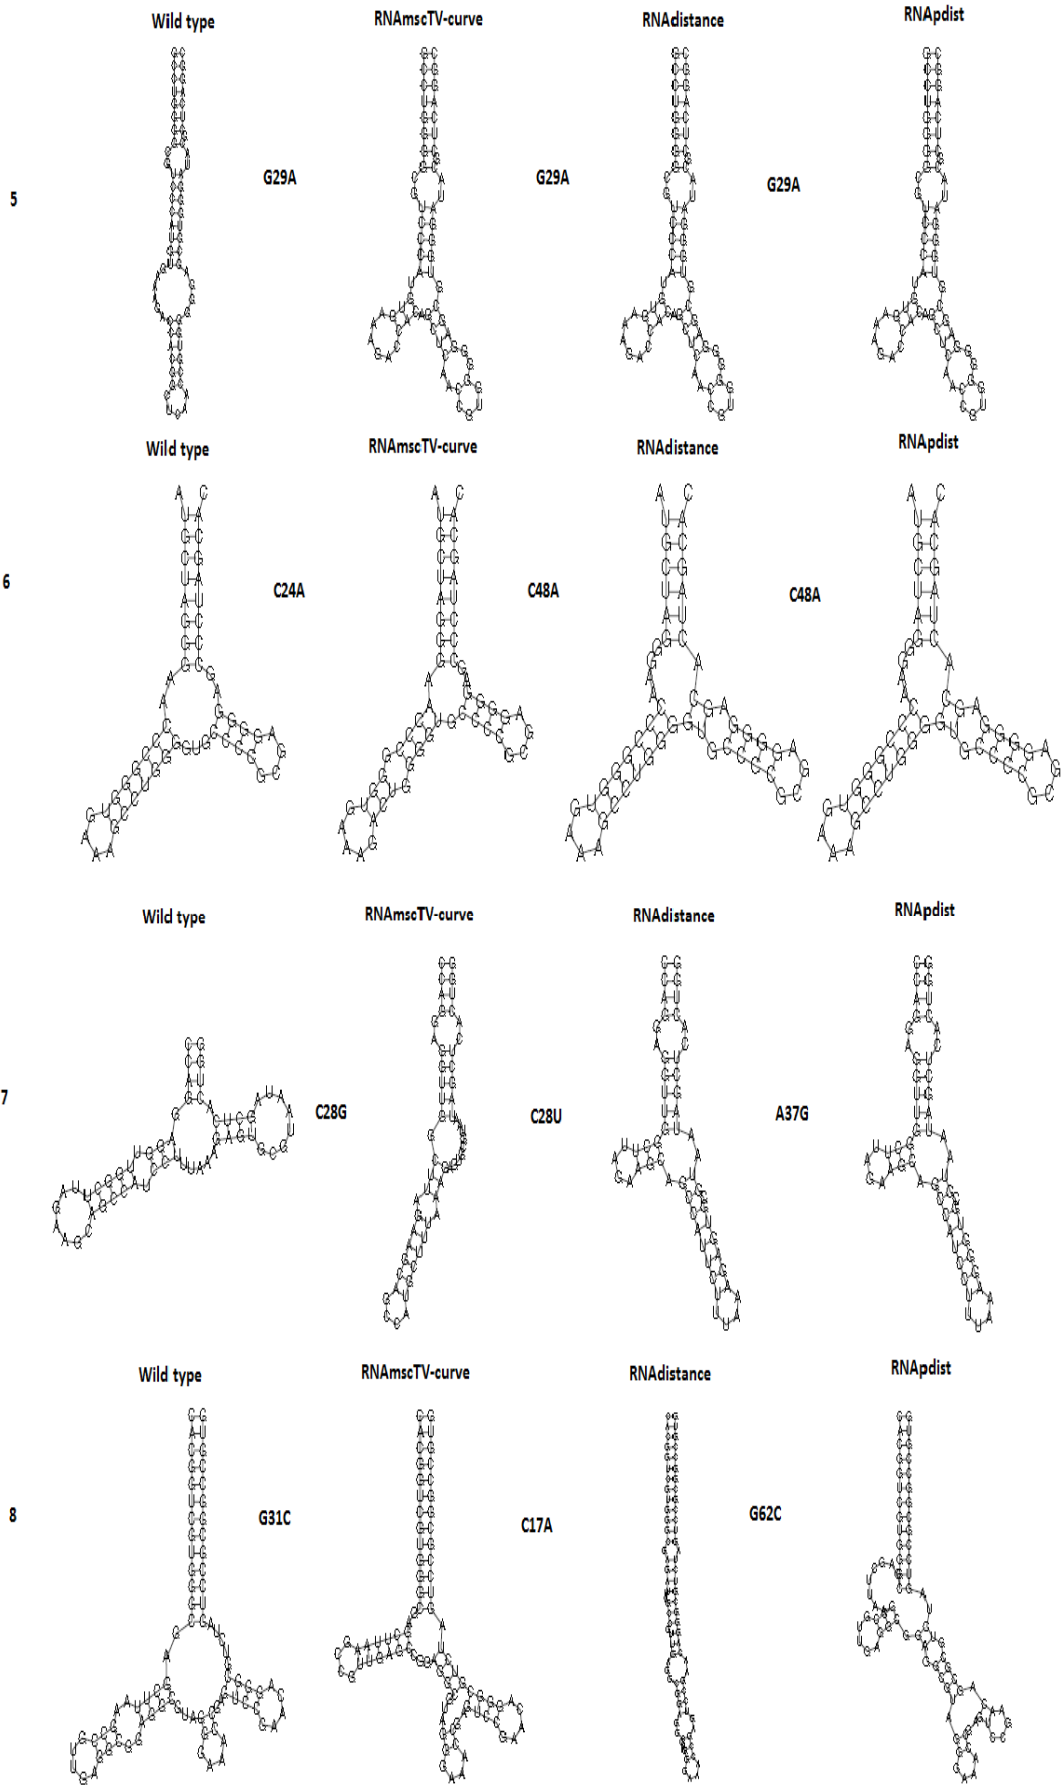

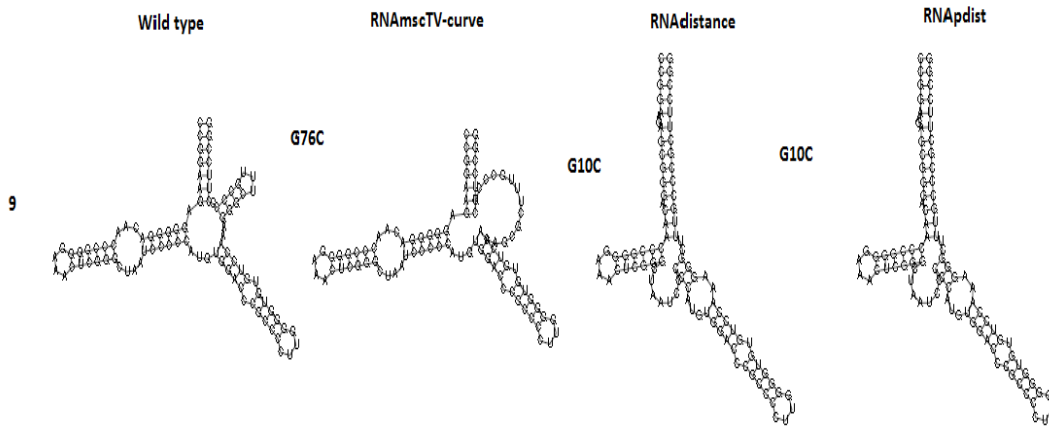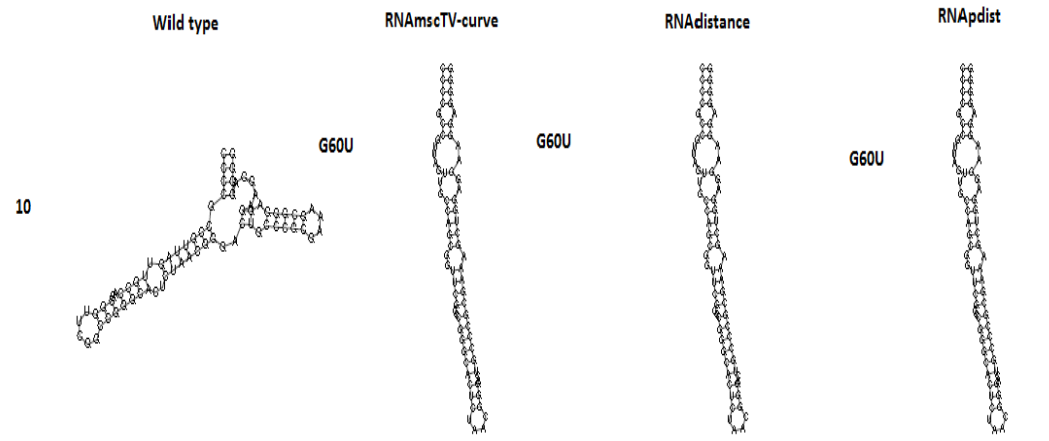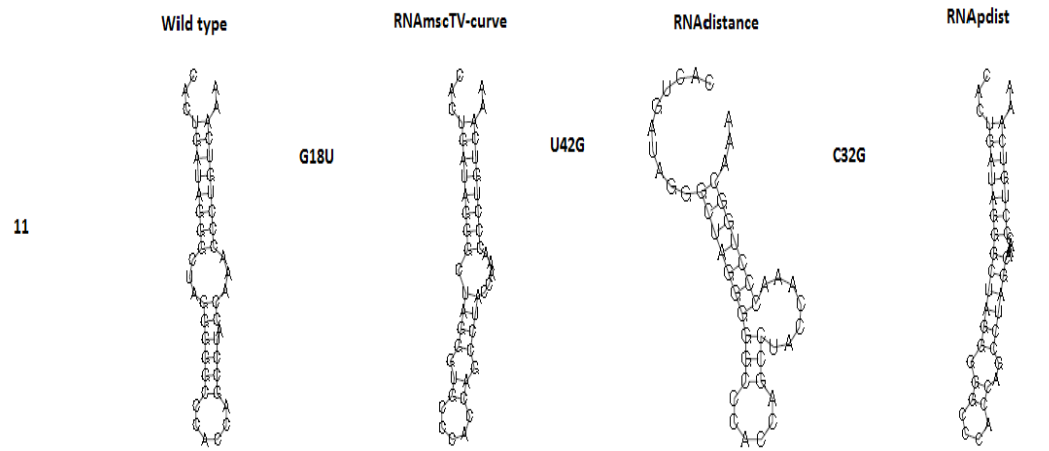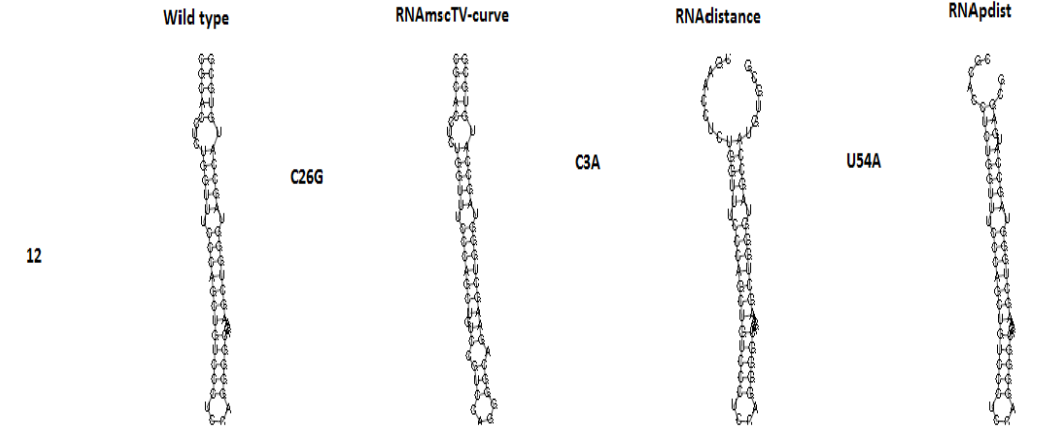

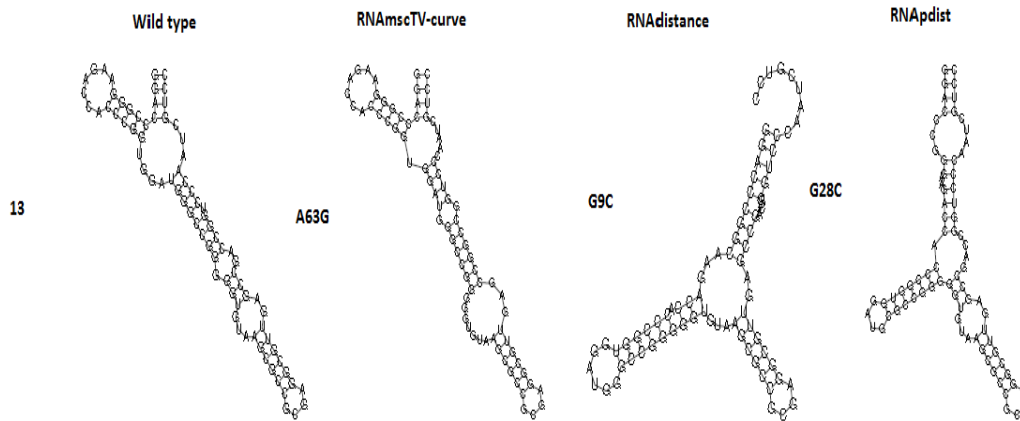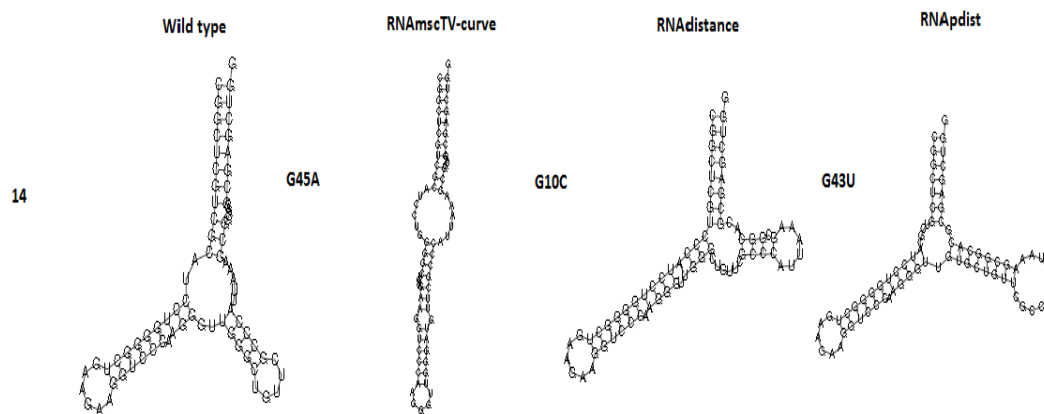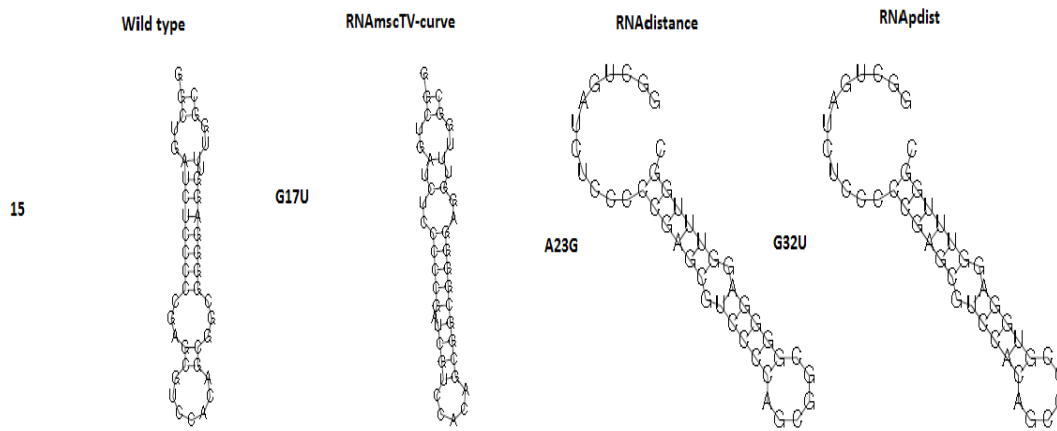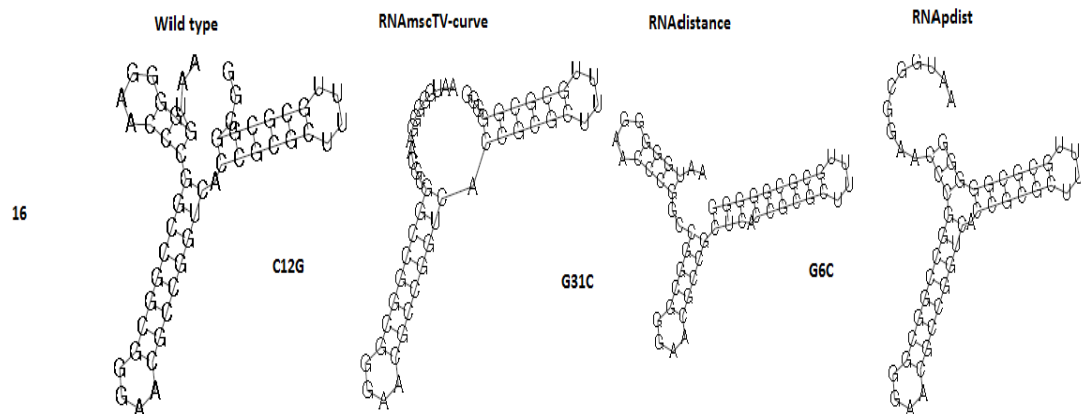

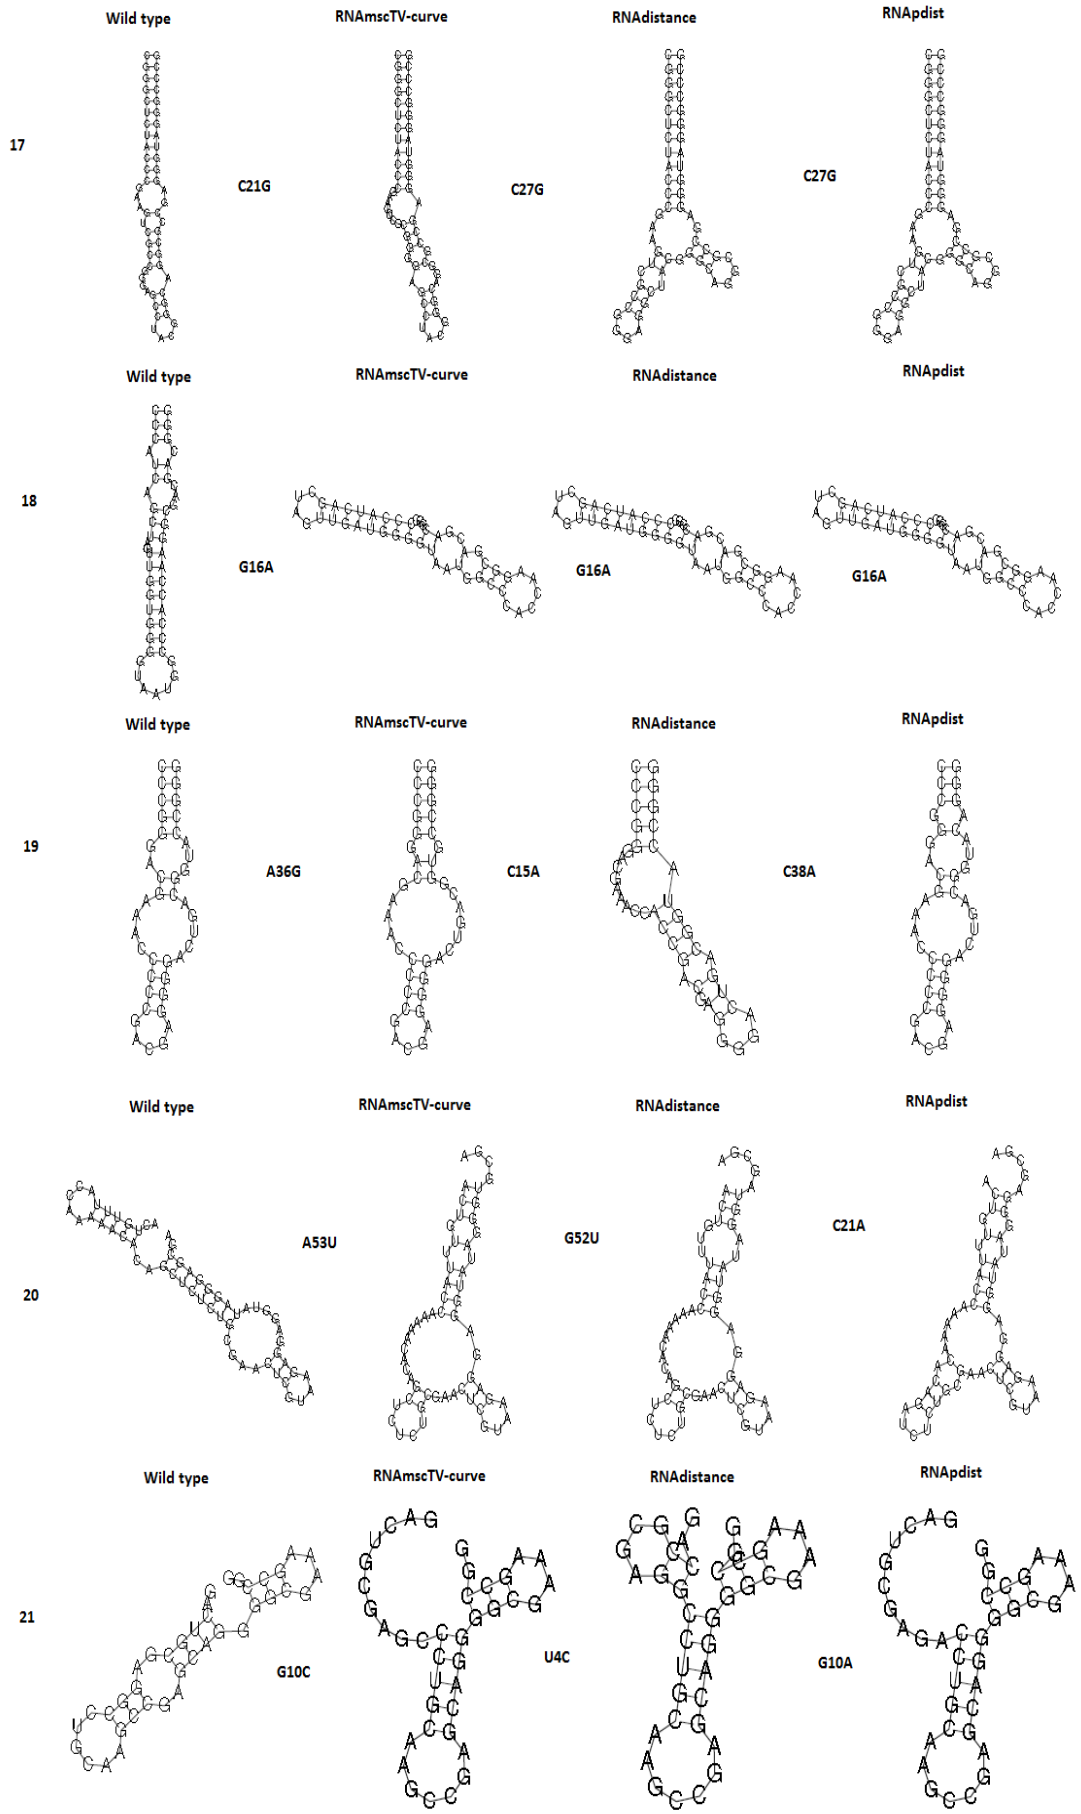

Supplement: 1471-2105-13-280-S1.pdf [file 1471-2105-13-280-S1.pdf]
