# Supplementary material for: Multi-scale RNA comparison based on RNA triple vector curve representation
Source: PubMed Central journal article supplement (PMC3599440; doi:10.1186/1471-2105-13-280), 2012-10-30
Supplement: 1471-2105-13-280-S2.pdf [file 1471-2105-13-280-S2.pdf]

**Table S1: 21 ribosomal RNA fragments of *thermus thermophilus* HB8**

| Index number | Name           | Length | Sequence                                                                                     |
|--------------|----------------|--------|----------------------------------------------------------------------------------------------|
| 1            | A_(765-816)    | 52     | GAAAGCGUGGGGAGCAAACCGGAUUAGAUACCCGGUAGUCCACGCCUAAA                                           |
| 2            | E_(68)         | 46     | CCGGAAGGUC AAGGGGAGGGGUGCAAGCCCCGAACCGAAGCCCCGG                                              |
| 3            | A_(1241-1296)  | 56     | GCCCACUACAAAAGCGAUGCCACCCGGCAACGGGGAGCUAAUCGCAAAAAGGUGGGC                                    |
| 4            | A_(820-879)    | 53     | GCGCGCUAGGUCUCUGGGUCUCUCCUGGGGGCCGAAGCUAACCGGUUAAAGCGCGC                                     |
| 5            | A_(588-651)    | 64     | GCCUGGGGCGUCCCAUGUGAAAAGACCACGGUCUACCGUGGGGGAGCGUGGGAUACGCUC<br>AGGC                         |
| 6            | A_(995-1045)   | 55     | AUGCUAGGGAACCCGGGUGAAAGCCUGGGGUGCCCCGCGAGGGGAGCCUAGCAC                                       |
| 7            | B_(1052-1107)  | 56     | CCAGGAGGUUGGCUUAGAAGCAGCCAUCUUUAAAAGAGUGCGUAAUAGCUCACUGG                                     |
| 8            | B_(589-668)    | 82     | CACGGUCUGGGCGAGCUUAAAGCCGUUAGGGCGAGGCGUAGGGAAACCGAGUCCGAACA<br>GGGCGUCUAGUCCGCGGCCGUG        |
| 9            | A_(136-227)    | 93     | CCGGAAGAGGGGACAACCCGGGAAACUCGGGCUAAUCCCCAUGUGGACCCGCCUUU<br>GGGUGUGUCCAAAGGGCUUUGCCCGCUUCCGG |
| 10           | A_(1113-1187)  | 74     | CCCCGCCGUUAGUUGCCAGCGGUUCGGCCGGGCACUCUAAACGGGACUGCCCCGAAAGCG<br>GGAGGAAGGAGGGG               |
| 11           | B_(865-911)    | 46     | CACUGAUAGGGCUAGGGGGCCACCAGCCUACCAAACCCUGUCAA                                                 |
| 12           | E_(2676-2731)  | 57     | CGCACCUUGGUUCCAGCUGUCCUCCAGGGGCAGAAGCUGGGUAGCCAUGUGCG                                        |
| 13           | E_(99,100,101) | 79     | GGACCCGGGAAGACCACCCGGUGGAUUGGGCCGGGGUGUAACGCCGCGAGGCGUUGAGCC<br>GACCGUCCAAUCGUCC             |
| 14           | E_(90,91,92)   | 76     | CGGCUCGUCGCAUCCUGGGGCGUAAGAAGGUCCAAAGGGUUGGGCUGUUCGCCAUUAAA<br>GCGGCACGCGAGCUGG              |
| 15           | E_(89)         | 43     | GGCUGAUCUCCCCGAGCGUCCACAGCGCGGGGAGUUUGGC                                                     |
| 16           | D_(8,9,10)     | 53     | AAUGGGGGAACCCGGCCGGCGGGAACGCCGGUCACCGCGUUUUGCGCGGGGG                                         |
| 17           | A_(1420-1480)  | 56     | CGGGCUCUACCCGAAGUCGCCGGGAGCCUACGGGCAGGCGCCGAGGGUAGGGCCCG                                     |
| 18           | A_(240-286)    | 47     | CCCAUCAGCUAGUUGGUGGGGUA AUGGCCACCAAGGCGACGACGGG                                              |
| 19           | A_(442-492)    | 41     | CCCGGGACGAAACCCCGACG AGGGGACUGACGGUACCGGG                                                    |
| 20           | E_(65,66)      | 57     | ACUGUUUACCAAAAACACAGCUCUCUGCGAACUCGUAAGAGGAGGUUAUAGGGAGCGA                                   |
| 21           | E_(86,87)      | 39     | GACUGCGAGGCCUGCAAGCC GAGCAGGGGCGAAAGCCGG                                                     |

**Table S2: The mutations with the largest difference from the wild types of 21 ribosomal RNA fragments using RNAmScTV-Curve, RNAdistance and RNApdist**

| Index number | Name          | Length | Mutation with smallest RNAmScTV-Curve | Mutation with largest RNAdistance | Mutation with largest RNApdist |
|--------------|---------------|--------|---------------------------------------|-----------------------------------|--------------------------------|
| 1            | A_(765-816)   | 52     | G21A                                  | G7C                               | C41G                           |
| 2            | E_(68)        | 46     | G19C                                  | G19A                              | G19C                           |
| 3            | A_(1241-1296) | 56     | C6A                                   | C14A                              | G43C                           |
| 4            | A_(820-879)   | 53     | G35C                                  | C4A                               | C4A                            |

|    |                |    |      |      |      |
|----|----------------|----|------|------|------|
| 5  | A_(588-651)    | 64 | G29A | G29A | G29A |
| 6  | A_(995-1045)   | 55 | C24A | C48A | C48A |
| 7  | B_(1052-1107)  | 56 | C28G | C28U | A37G |
| 8  | B_(589-668)    | 82 | G31C | C17A | G62C |
| 9  | A_(136-227)    | 93 | G76C | G10C | G10C |
| 10 | A_(1113-1187)  | 74 | G60U | G60U | G60U |
| 11 | B_(865-911)    | 46 | G18U | U42G | C32G |
| 12 | E_(2676-2731)  | 57 | C26G | C3A  | U54A |
| 13 | E_(99,100,101) | 79 | A63G | G9C  | G28C |
| 14 | E_(90,91,92)   | 76 | C45A | G10C | G43U |
| 15 | E_(89)         | 43 | G17U | A23C | G32U |
| 16 | D_(8,9,10)     | 53 | C12G | G31C | G6C  |
| 17 | A_(1420-1480)  | 56 | C21G | C27G | C27G |
| 18 | A_(240-286)    | 47 | G16A | G16A | G16A |
| 19 | A_(442-492)    | 41 | A36G | C15A | C38A |
| 20 | E_(65,66)      | 57 | A53U | G52U | C21A |
| 21 | E_(86,87)      | 39 | G10C | U4C  | G10A |
